# Supplementary material for: Decreased levels of circulating trimethylamine N-oxide alleviate cognitive and pathological deterioration in transgenic mice: a potential therapeutic approach for Alzheimer’s disease
Source: PubMed Central journal article supplement (PMC6814608; doi:10.18632/aging.102352), 2019-10-14
Supplement: aging-11-102352-s001.pdf [file aging-11-102352-s001.pdf]

## SUPPLEMENTARY TABLE

**Supplementary Table 1. Spearman correlation between the plasma TMAO concentrations and cytokine concentrations in the hippocampus of WT and APP/PS1 mice (n=10).**

|                      | Cytokine in hippocampus |        |        |        |               |        |               |        |         |        |        |        |
|----------------------|-------------------------|--------|--------|--------|---------------|--------|---------------|--------|---------|--------|--------|--------|
|                      | IL-1 $\beta$            | IL-6   | IP-10  | GM-CSF | INF- $\gamma$ | MCP-1  | MIP-1 $\beta$ | RANTES | Eotaxin | IL-4   | IL-5   | G-CSF  |
| <b>R<sup>2</sup></b> | 0.0173                  | 0.5484 | 0.154  | 0.0938 | 0.3644        | 0.4939 | 0.1232        | 0.8682 | 0.1423  | 0.1532 | 0.3212 | 0.8893 |
| <b>P</b>             | 0.4054                  | 0.7900 | 0.6898 | 0.7943 | 0.5296        | 0.2699 | 0.8525        | 0.9229 | 0.2431  | 0.4802 | 0.6826 | 0.3748 |

IL means interleukin, IP means interferon-induced protein, G-CSF means granulocyte colony stimulating factor, GM-CSF means granulocyte-macrophage colony stimulating factor, IFN $\gamma$  means interferon- $\gamma$ , MCP-1 means monocyte chemotactic protein-1, RANTES means regulated upon activation normal T cell expressed and secreted factor, MIP-1 $\beta$ , macrophage inflammatory protein-1 $\beta$ .
